# Supplementary material for: SF3B1 inhibition disrupts malignancy and prolongs survival in glioblastoma patients through BCL2L1 splicing and mTOR/ß-catenin pathways imbalances
Source: Springer Nature journal article supplement (doi:10.1186/s13046-022-02241-4), 2022-01-27
Supplement: MOESM1 [file 20072836]

Figure S1

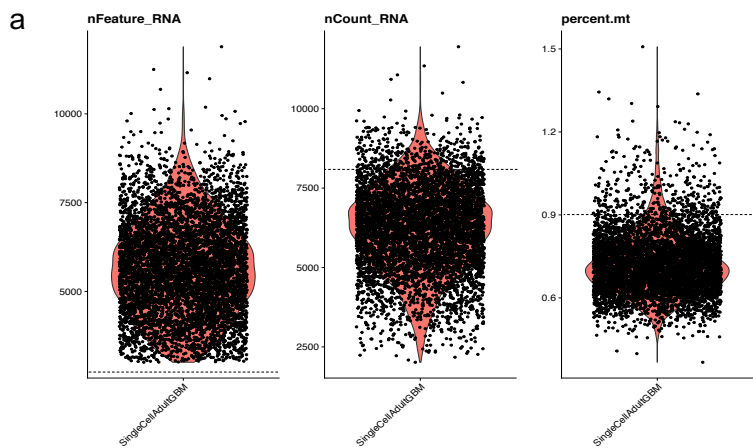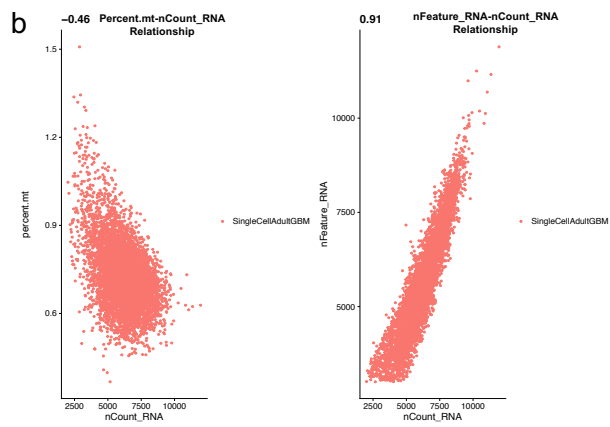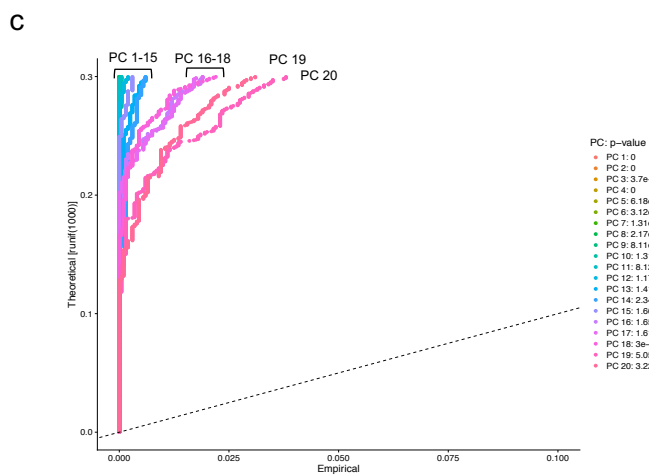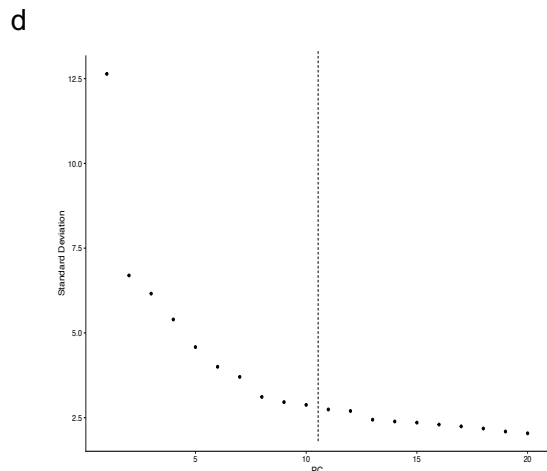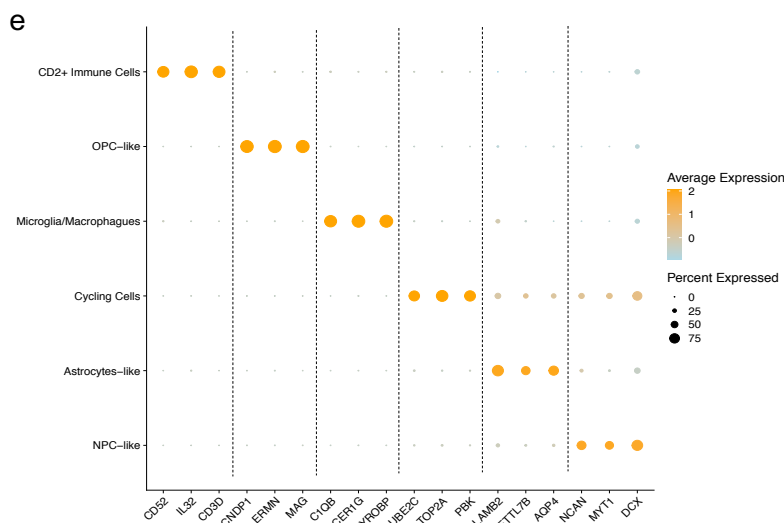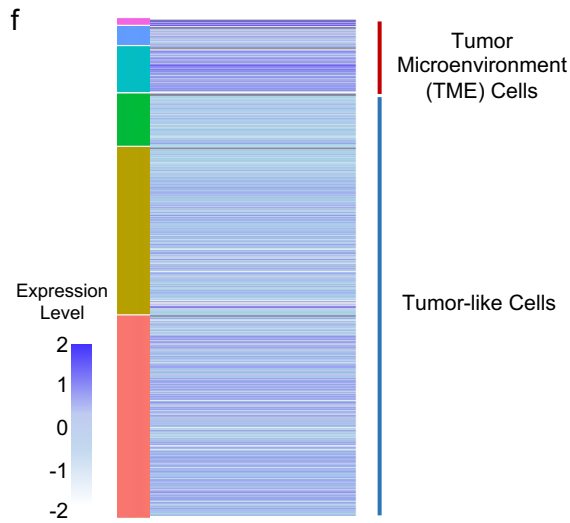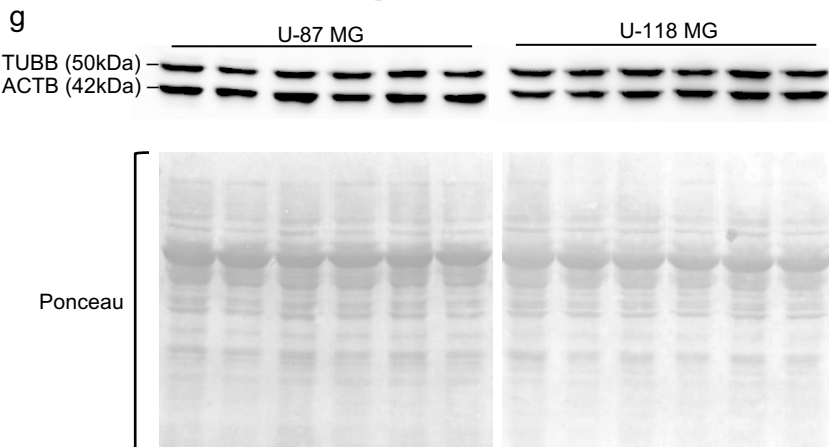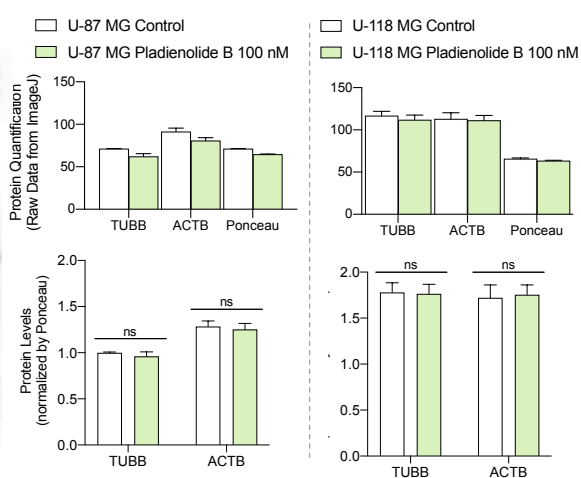

Figure S2

**a** TCGA dataset

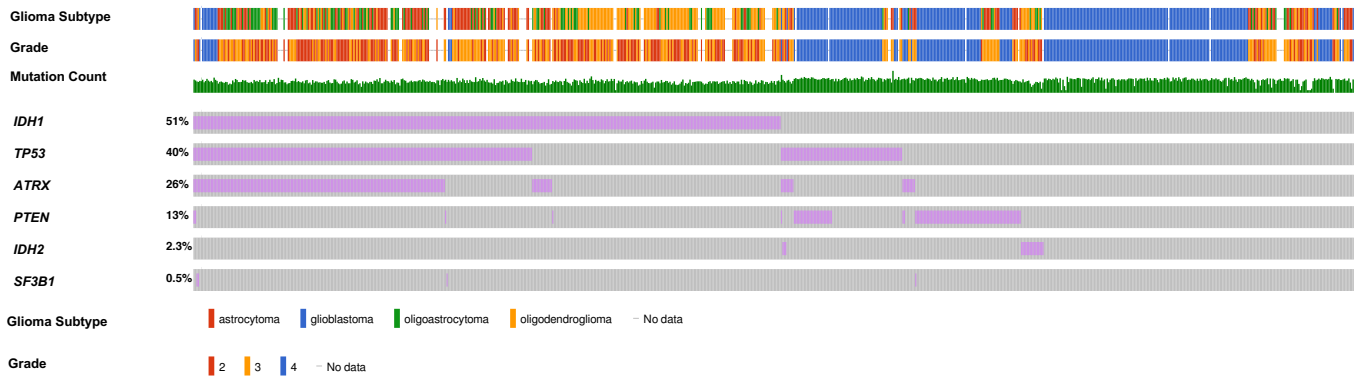

**b** MSKCC dataset

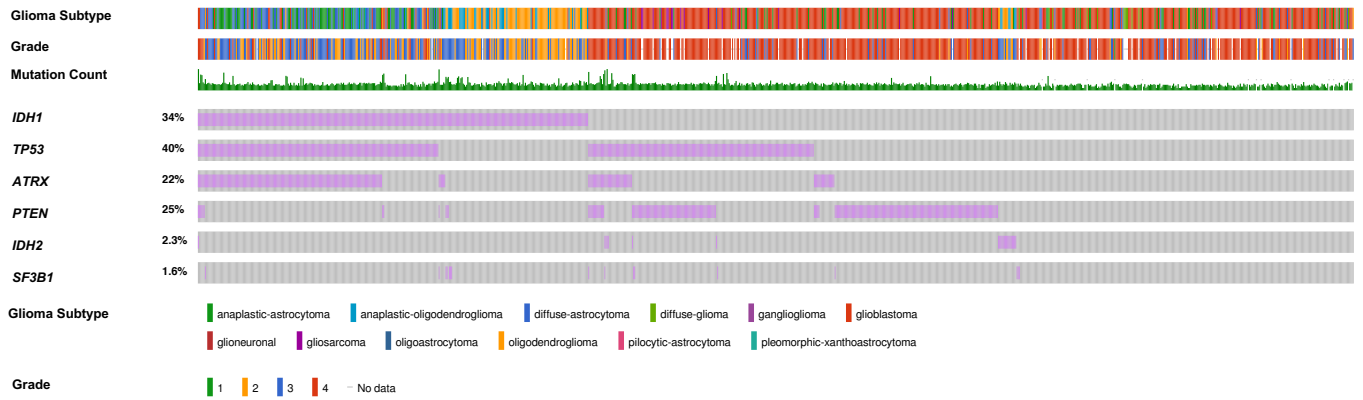

**c**

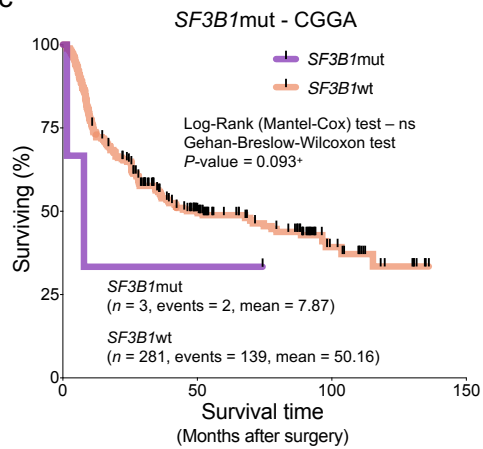

**d**

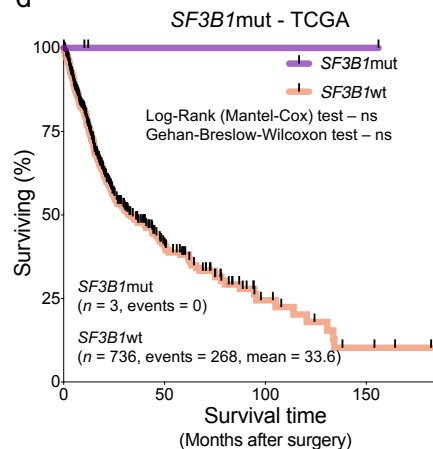

**e**

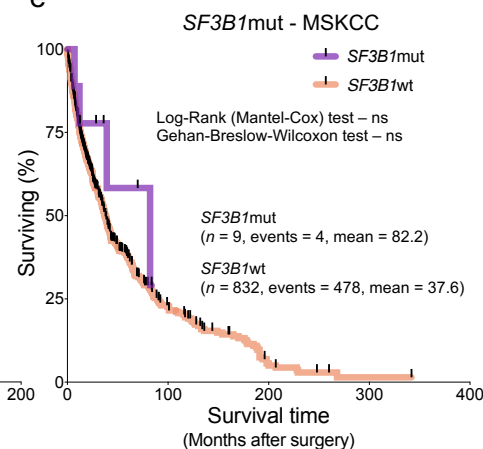

**f**

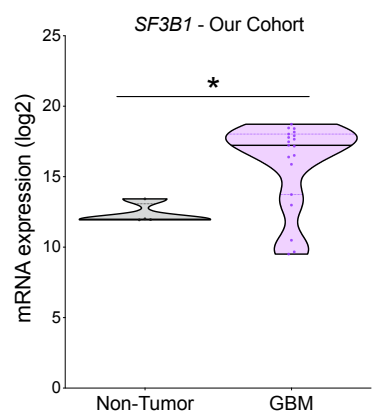

**g**

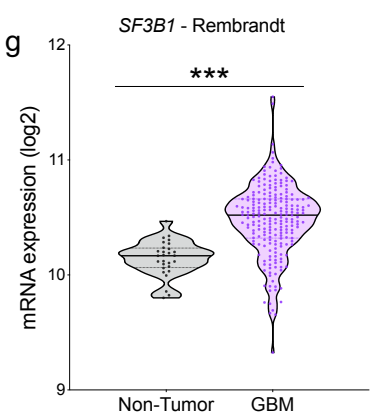

Figure S3

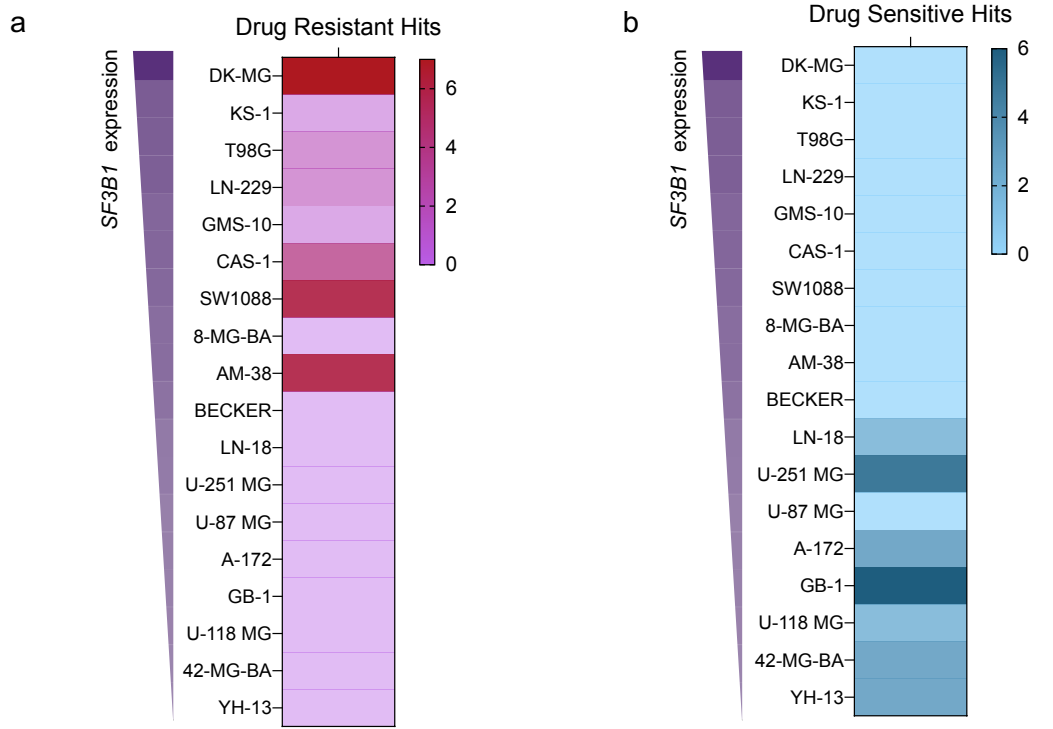

C

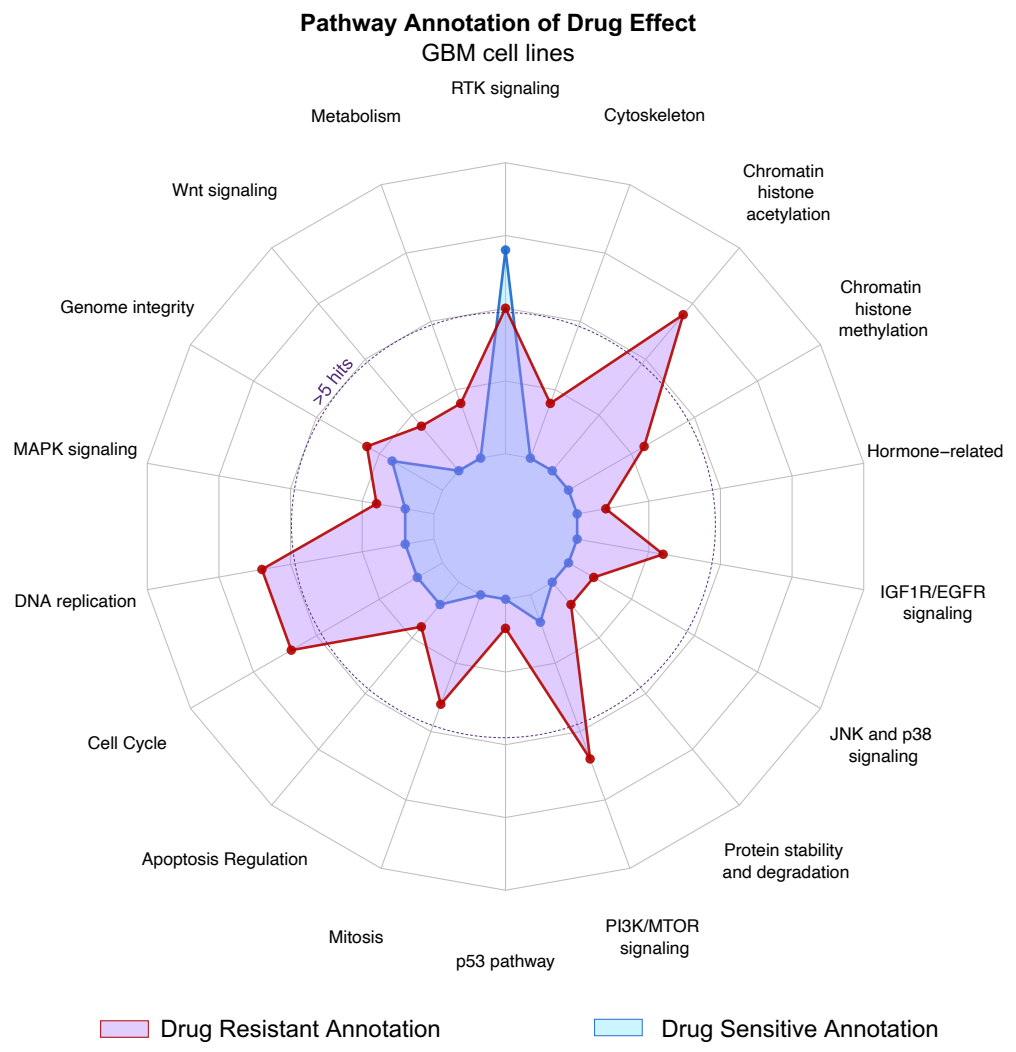

Figure S4

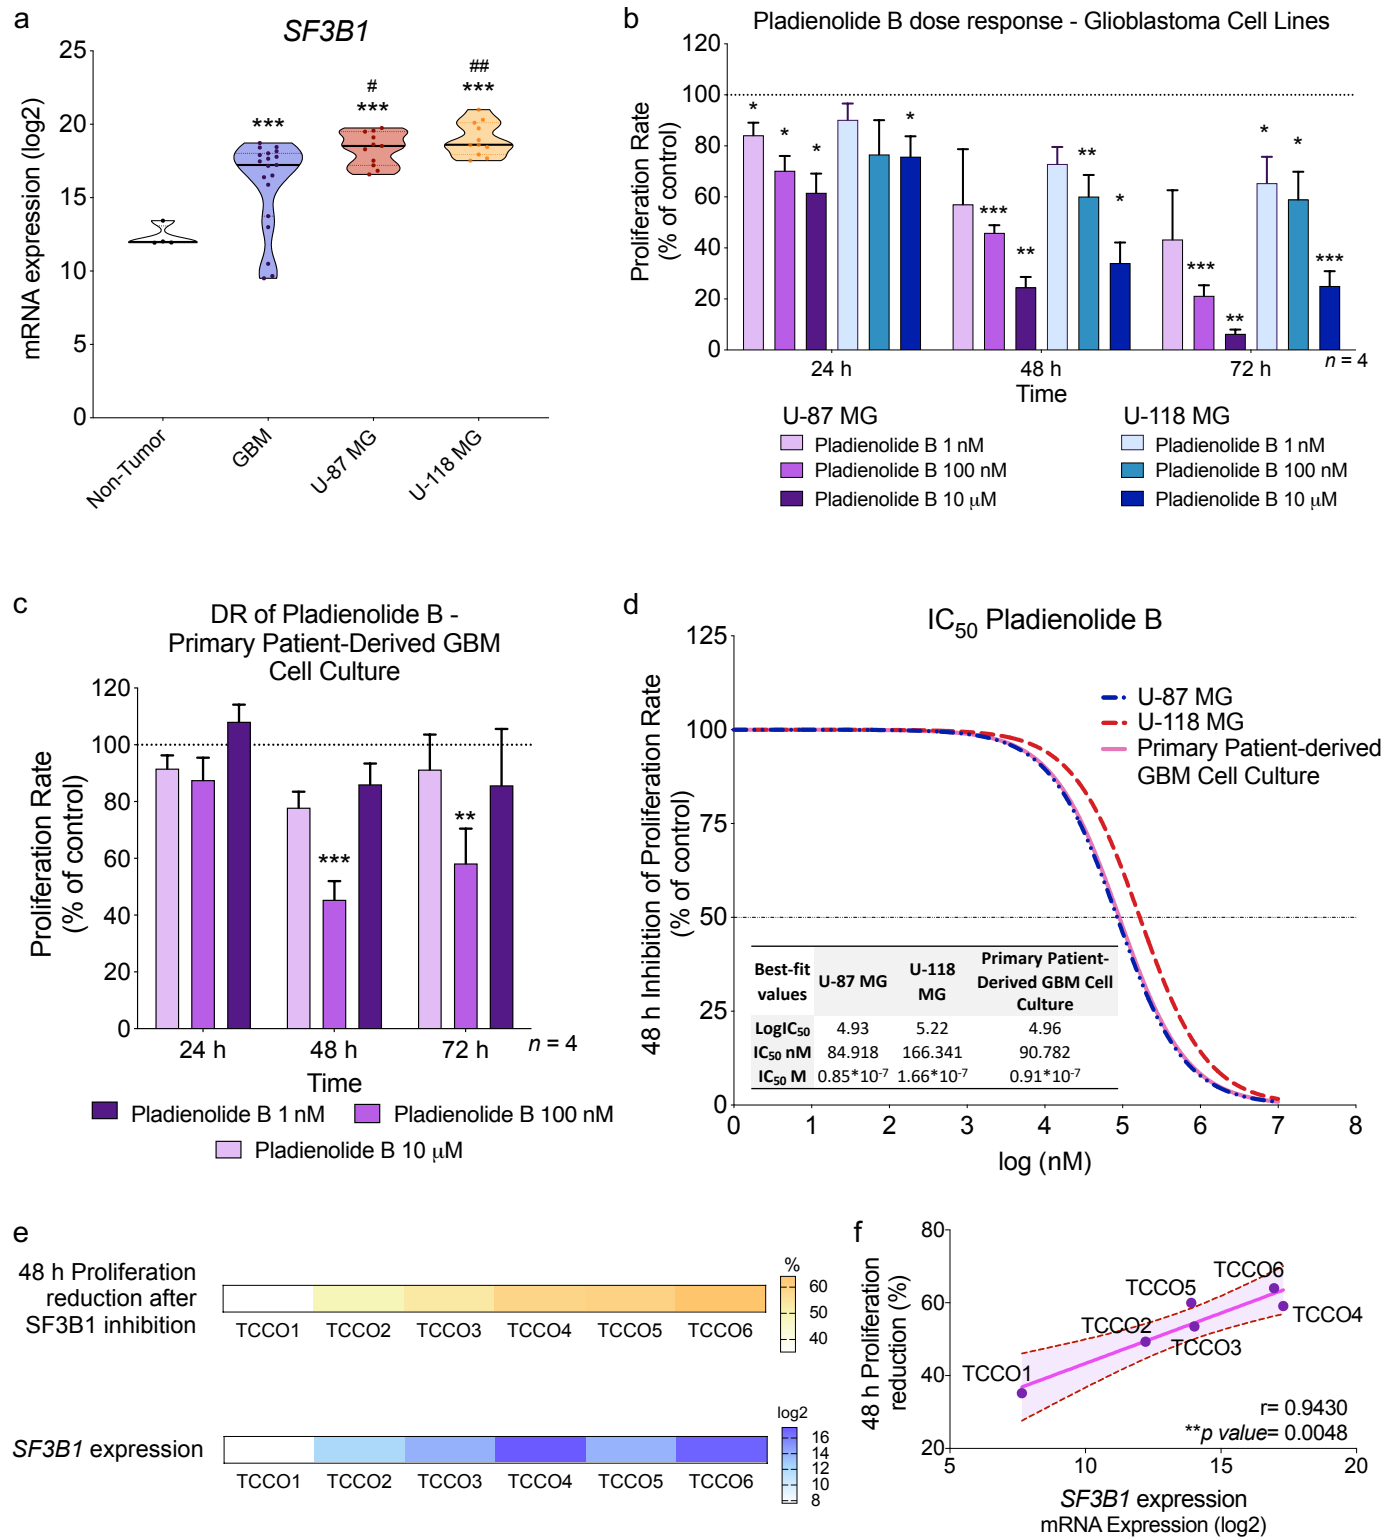

Figure S5

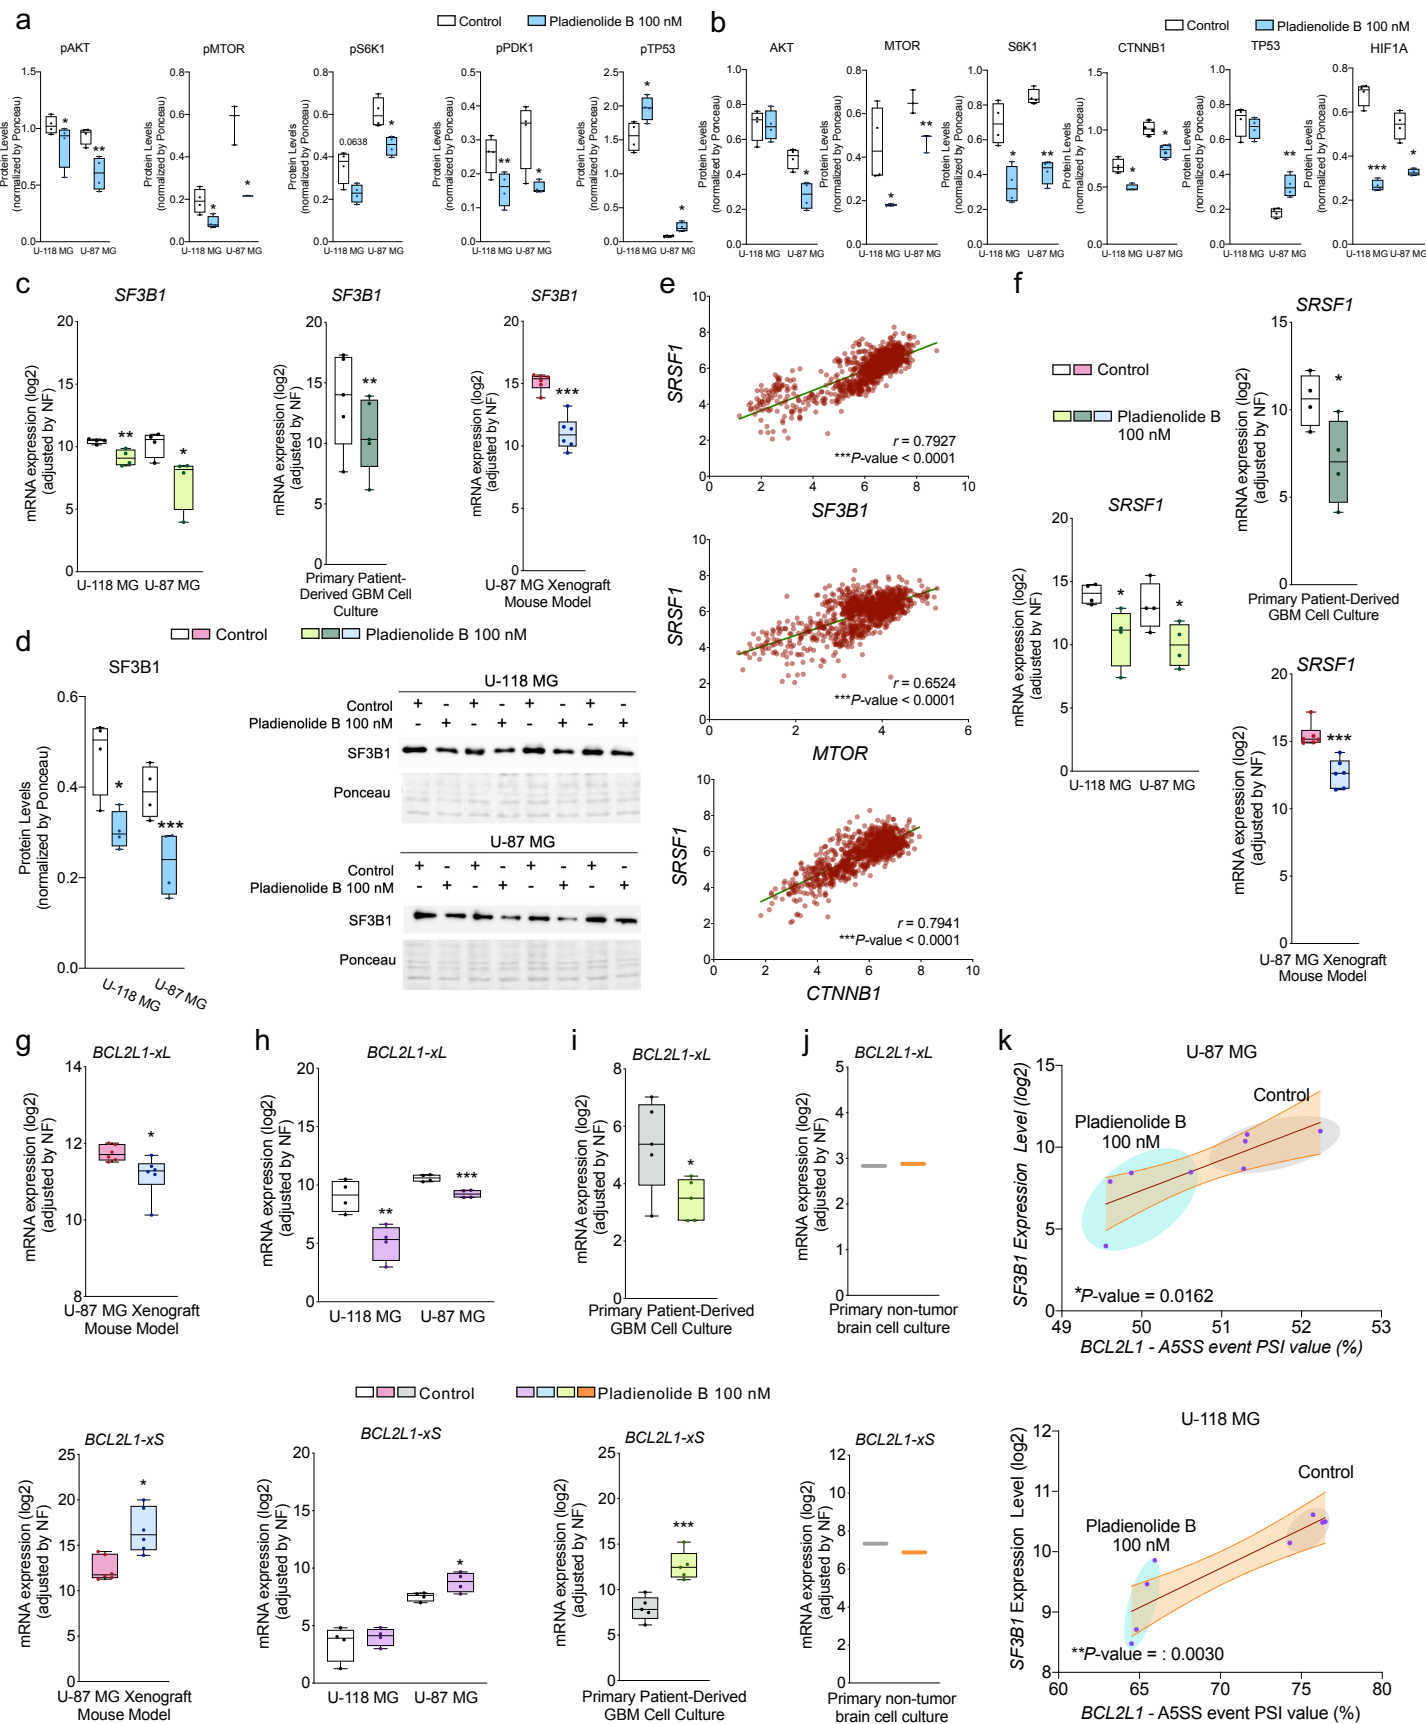

Table S1

| Parameters                                         | Glioma patients               |
|----------------------------------------------------|-------------------------------|
| CGGA WEsseq                                        |                               |
| <b>Patients (n)</b>                                | 284                           |
| <b>Gender (M/F)</b>                                | 168 (59.15 %) / 116 (40.85 %) |
| <b>Primary LGG</b>                                 | 124 (43.67 %)                 |
| <b>Recurrent LGG</b>                               | 58 (20.42 %)                  |
| <b>Primary GBM</b>                                 | 54 (19.01 %)                  |
| <b>Recurrent GBM</b>                               | 48 (16.90 %)                  |
| <b>Age at surgical intervention (mean±desvest)</b> | 41.97 ± 12.34                 |
| <b>Grade II</b>                                    | 91 (32.04 %)                  |
| <b>Grade III</b>                                   | 91 (32.04 %)                  |
| <b>Grade IV</b>                                    | 102 (35.92 %)                 |
| <b>GBM <i>IDH1</i> status (wt/mut)</b>             | 151 (53.17 %) / 133 (46.83 %) |
| <b>GBM survival rate (Mean - Months)</b>           | 42.03 ± 34.89                 |
| TCGA                                               |                               |
| <b>Patients (n)</b>                                | 746                           |
| <b>Gender (M/F)</b>                                | 441 (59.11 %) / 305 (40.88 %) |
| <b>Primary LGG</b>                                 | 451 (60.46 %)                 |
| <b>Recurrent LGG</b>                               | N/A                           |
| <b>Primary GBM</b>                                 | 295 (39.54 %)                 |
| <b>Recurrent GBM</b>                               | N/A                           |
| <b>Age at surgical intervention (mean±desvest)</b> | 50.26 ± 15.91                 |
| <b>Grade II</b>                                    | 212 (28.42 %)                 |
| <b>Grade III</b>                                   | 239 (32.04 %)                 |
| <b>Grade IV</b>                                    | 295 (39.54 %)                 |
| <b>GBM <i>IDH1</i> status (wt/mut)</b>             | 315 (50.97 %) / 303 (49.03 %) |
| <b>GBM survival rate (Mean - Months)</b>           | 19.08 ± 24.57                 |
| MSKCC                                              |                               |
| <b>Patients (n)</b>                                | 923                           |
| <b>Gender (M/F)</b>                                | 557 (60.35 %) / 366 (39.65 %) |
| <b>Primary LGG</b>                                 | 273 (29.58 %)                 |
| <b>Recurrent LGG</b>                               | 123 (13.33 %)                 |
| <b>Primary GBM</b>                                 | 431 (46.70 %)                 |
| <b>Recurrent GBM</b>                               | 118 (12.78 %)                 |
| <b>Age at surgical intervention (mean±desvest)</b> | 49.49 ± 16.06                 |
| <b>Grade II</b>                                    | 145 (15.71 %)                 |
| <b>Grade III</b>                                   | 251 (27.19 %)                 |
| <b>Grade IV</b>                                    | 549 (59.48 %)                 |
| <b>GBM <i>IDH1</i> status (wt/mut)</b>             | 584 (63.27 %) / 339 (33.8 %)  |
| <b>GBM survival rate (Mean - Months)</b>           | 40.61 ± 48.49                 |

Table S2

| Parameters                                         | Control patients  | GBM patients                  |
|----------------------------------------------------|-------------------|-------------------------------|
| <b>Our Cohort</b>                                  |                   |                               |
| <b>Patients (n)</b>                                | 4                 | 22                            |
| <b>Gender (M/F)</b>                                | 1(25 %) / 3(75 %) | 17(77.27%) / 5(23.73%)        |
| <b>Age at surgical intervention (mean±desvest)</b> | 51.2 ± 5.38       | 59.81 ± 12.77                 |
| <b>Grade IV</b>                                    | -                 | 22                            |
| <b>%Ki67 (mean±desvest)</b>                        | -                 | 33.9 ± 14.76                  |
| <b>% of P53 positive</b>                           | -                 | 72.73 %                       |
| <b>% of PAGF positive</b>                          | -                 | 72.73 %                       |
| <b>% of IDH1 positive</b>                          | -                 | 18.18 %                       |
| <b>GBM survival rate (Mean - Months)</b>           | -                 | 14.92                         |
| <b>Rembrandt</b>                                   |                   |                               |
| <b>Patients (n)</b>                                | 28                | 219                           |
| <b>Gender (M/F)</b>                                | N/A               | N/A                           |
| <b>Age at surgical intervention (mean±desvest)</b> | N/A               | N/A                           |
| <b>Grade IV</b>                                    | -                 | 219                           |
| <b>Molecular subtype:Classical</b>                 | -                 | 99 (45.21 %)                  |
| <b>Molecular subtype:Mesenchymal</b>               | -                 | 37 (16.89 %)                  |
| <b>Molecular subtype:Proneural</b>                 | -                 | 39 (17.81 %)                  |
| <b>G-CIMP status (Positive/Negative)</b>           | -                 | 11 (5.02 %) / 208 (94.98 %)   |
| <b>GBM survival rate (Mean - Months)</b>           | -                 | 19.83                         |
| <b>CGGA</b>                                        |                   |                               |
| <b>Patients (n)</b>                                | -                 | 388                           |
| <b>Gender (M/F)</b>                                | -                 | 236 (60.82 %) / 152 (29.18 %) |
| <b>Age at surgical intervention (mean±desvest)</b> | -                 | 48.01 ± 13.30                 |
| <b>Grade IV</b>                                    | -                 | 388                           |
| <b>Molecular GBM subtype:Classical</b>             | -                 | 107 (25.58 %)                 |
| <b>Molecular GBM subtype:Mesenchymal</b>           | -                 | 89 (30.90 %)                  |
| <b>Molecular GBM subtype:Proneural</b>             | -                 | 83 (21.39 %)                  |
| <b>Primary GBM</b>                                 | -                 | 225 (57.99 %)                 |
| <b>Secondary GBM</b>                               | -                 | 30 (6.15 %)                   |
| <b>Recurrent GBM</b>                               | -                 | 133 (35.86 %)                 |
| <b>GBM IDH1 status (wt/mut)</b>                    | -                 | 288 (74.23 %) / 100 (25.77 %) |
| <b>GBM survival rate (Mean - Months)</b>           | -                 | 17.15                         |

Table S3

| <i>P</i> -value | pct.1 | pct.2 | p_val_adj | cluster | gene            |                       |
|-----------------|-------|-------|-----------|---------|-----------------|-----------------------|
| 0               | 0.819 | 0.429 | 0         | 0       | <i>DCX</i>      | NPC-like              |
| 0               | 0.612 | 0.132 | 0         | 0       | <i>MYT1</i>     |                       |
| 8.55E-276       | 0.675 | 0.183 | 1.87E-270 | 0       | <i>NCAN</i>     |                       |
| 3.22E-267       | 0.61  | 0.159 | 7.04E-263 | 0       | <i>MIAT</i>     |                       |
| 9.94E-261       | 0.845 | 0.611 | 2.17E-256 | 0       | <i>CD24</i>     |                       |
| 1.10E-253       | 0.565 | 0.126 | 2.40E-249 | 0       | <i>ELAVL4</i>   |                       |
| 4.36E-220       | 0.583 | 0.175 | 9.53E-216 | 0       | <i>TAGLN3</i>   |                       |
| 1.08E-217       | 0.415 | 0.055 | 2.35E-213 | 0       | <i>STMN2</i>    |                       |
| 2.16E-200       | 0.606 | 0.209 | 4.73E-196 | 0       | <i>B4GALNT1</i> |                       |
| 6.80E-138       | 0.363 | 0.079 | 1.49E-132 | 0       | <i>NNAT</i>     |                       |
| 0               | 0.733 | 0.147 | 0         | 1       | <i>AQP4</i>     | Astrocytes-like       |
| 0               | 0.645 | 0.126 | 0         | 1       | <i>METTL7B</i>  |                       |
| 0               | 0.85  | 0.246 | 0         | 1       | <i>LAMB2</i>    |                       |
| 0               | 0.856 | 0.331 | 0         | 1       | <i>TNC</i>      |                       |
| 0               | 0.62  | 0.121 | 0         | 1       | <i>EMP1</i>     |                       |
| 2.66E-289       | 0.716 | 0.186 | 5.82E-285 | 1       | <i>HOPX</i>     |                       |
| 9.51E-288       | 0.811 | 0.262 | 2.08E-282 | 1       | <i>S100A16</i>  |                       |
| 3.06E-274       | 0.813 | 0.27  | 6.69E-270 | 1       | <i>LGALS3</i>   |                       |
| 2.82E-256       | 0.844 | 0.488 | 6.17E-252 | 1       | <i>F3</i>       |                       |
| 3.09E-183       | 0.387 | 0.063 | 6.76E-179 | 1       | <i>CHI3L1</i>   |                       |
| 0               | 0.836 | 0.044 | 0         | 2       | <i>PBK</i>      | Cycling Cells         |
| 0               | 0.887 | 0.073 | 0         | 2       | <i>TOP2A</i>    |                       |
| 0               | 0.808 | 0.071 | 0         | 2       | <i>UBE2C</i>    |                       |
| 0               | 0.882 | 0.073 | 0         | 2       | <i>BIRC5</i>    |                       |
| 0               | 0.895 | 0.102 | 0         | 2       | <i>UBE2T</i>    |                       |
| 0               | 0.753 | 0.054 | 0         | 2       | <i>FAM64A</i>   |                       |
| 0               | 0.863 | 0.078 | 0         | 2       | <i>TPX2</i>     |                       |
| 0               | 0.886 | 0.112 | 0         | 2       | <i>NUSAP1</i>   |                       |
| 0               | 0.803 | 0.07  | 0         | 2       | <i>CDK1</i>     |                       |
| 0               | 0.799 | 0.044 | 0         | 2       | <i>NUF2</i>     |                       |
| 0               | 0.983 | 0.007 | 0         | 3       | <i>TYROBP</i>   | Microglia/Macrophages |
| 0               | 0.977 | 0.018 | 0         | 3       | <i>FCER1G</i>   |                       |
| 0               | 0.924 | 0.008 | 0         | 3       | <i>C1QB</i>     |                       |
| 0               | 0.968 | 0.031 | 0         | 3       | <i>RGS1</i>     |                       |
| 0               | 0.971 | 0.026 | 0         | 3       | <i>SRGN</i>     |                       |
| 0               | 0.947 | 0.005 | 0         | 3       | <i>C1QA</i>     |                       |
| 0               | 0.935 | 0.007 | 0         | 3       | <i>C1QC</i>     |                       |
| 0               | 0.947 | 0.006 | 0         | 3       | <i>FCGR3A</i>   |                       |
| 0               | 0.996 | 0.031 | 0         | 3       | <i>LAPTM5</i>   |                       |
| 0               | 0.996 | 0.071 | 0         | 3       | <i>HLA.DRA</i>  |                       |
| 0               | 0.99  | 0.009 | 0         | 4       | <i>MAG</i>      | OPC-like              |
| 0               | 0.995 | 0.022 | 0         | 4       | <i>ERMN</i>     |                       |
| 0               | 0.97  | 0.013 | 0         | 4       | <i>CNDP1</i>    |                       |
| 0               | 1     | 0.031 | 0         | 4       | <i>ENPP2</i>    |                       |
| 0               | 0.98  | 0.011 | 0         | 4       | <i>KLK6</i>     |                       |
| 0               | 0.98  | 0.013 | 0         | 4       | <i>SPOCK3</i>   |                       |
| 0               | 1     | 0.074 | 0         | 4       | <i>PTGDS</i>    |                       |
| 0               | 1     | 0.091 | 0         | 4       | <i>TF</i>       |                       |
| 0               | 0.985 | 0.043 | 0         | 4       | <i>RNASE1</i>   |                       |
| 0               | 1     | 0.08  | 0         | 4       | <i>TMEM144</i>  |                       |
| 0               | 0.91  | 0.001 | 0         | 5       | <i>CD3D</i>     | CD2+ Immune Cells     |
| 0               | 0.955 | 0.021 | 0         | 5       | <i>IL32</i>     |                       |
| 0               | 0.866 | 0.006 | 0         | 5       | <i>CD52</i>     |                       |
| 0               | 0.866 | 0.003 | 0         | 5       | <i>CD2</i>      |                       |
| 0               | 0.97  | 0.002 | 0         | 5       | <i>CD3E</i>     |                       |
| 0               | 0.866 | 0.019 | 0         | 5       | <i>IL2RG</i>    |                       |
| 2.33E-230       | 0.896 | 0.038 | 5.10E-225 | 5       | <i>CYTIP</i>    |                       |
| 1.74E-186       | 0.881 | 0.048 | 3.80E-182 | 5       | <i>PTPRCAP</i>  |                       |
| 8.28E-180       | 0.761 | 0.035 | 1.81E-175 | 5       | <i>IFITM1</i>   |                       |
| 2.03E-141       | 1     | 0.09  | 4.43E-137 | 5       | <i>LCP1</i>     |                       |



Table S4

| <b>Parameters</b>                                  | <b>Non-tumor patients</b> | <b>GBMs patients</b> |
|----------------------------------------------------|---------------------------|----------------------|
| CPTAC                                              |                           |                      |
| <b>Patients (n)</b>                                | 10                        | 100                  |
| <b>Gender (M/F)</b>                                | 5(50 %) / 5(50 %)         | 56(56 %) / 44(44 %)  |
| <b>Age at surgical intervention (mean±desvest)</b> | 57.5 ± 9.10               | 57.93 ± 12.44        |
| <b>Grade IV</b>                                    | -                         | 100                  |
| <b>GBM survival rate (Mean - Months)</b>           | -                         | 11.26                |

Table S5

| #term ID    | term description                                                      | observed gene count | background gene count | <i>P-value</i><br>FDR <0.01 |
|-------------|-----------------------------------------------------------------------|---------------------|-----------------------|-----------------------------|
| HSA-8953854 | Metabolism of RNA                                                     | 126                 | 652                   | 1.68E-28                    |
| HSA-72172   | mRNA Splicing                                                         | 66                  | 186                   | 2.64E-26                    |
| HSA-72203   | Processing of Capped Intron-Containing Pre-mRNA                       | 73                  | 234                   | 2.64E-26                    |
| HSA-72163   | mRNA Splicing - Major Pathway                                         | 64                  | 178                   | 5.75E-26                    |
| HSA-74160   | Gene expression (Transcription)                                       | 143                 | 1366                  | 6.95E-11                    |
| HSA-73857   | RNA Polymerase II Transcription                                       | 125                 | 1233                  | 1.52E-08                    |
| HSA-392499  | Metabolism of proteins                                                | 166                 | 1948                  | 1.65E-06                    |
| HSA-72187   | mRNA 3'-end processing                                                | 18                  | 56                    | 3.52E-06                    |
| HSA-109688  | Cleavage of Growing Transcript in the Termination Region              | 19                  | 65                    | 4.60E-06                    |
| HSA-162599  | Late Phase of HIV Life Cycle                                          | 27                  | 135                   | 5.92E-06                    |
| HSA-3700989 | Transcriptional Regulation by TP53                                    | 48                  | 359                   | 6.39E-06                    |
| HSA-162587  | HIV Life Cycle                                                        | 28                  | 148                   | 7.95E-06                    |
| HSA-162906  | HIV Infection                                                         | 35                  | 224                   | 1.29E-05                    |
| HSA-1640170 | Cell Cycle                                                            | 65                  | 586                   | 1.59E-05                    |
| HSA-674695  | RNA Polymerase II Pre-transcription Events                            | 20                  | 84                    | 1.98E-05                    |
| HSA-69620   | Cell Cycle Checkpoints                                                | 38                  | 265                   | 2.24E-05                    |
| HSA-72202   | Transport of Mature Transcript to Cytoplasm                           | 19                  | 77                    | 2.24E-05                    |
| HSA-5696398 | Nucleotide Excision Repair                                            | 22                  | 109                   | 5.00E-05                    |
| HSA-112382  | Formation of RNA Pol II elongation complex                            | 16                  | 61                    | 7.93E-05                    |
| HSA-159236  | Transport of Mature mRNA derived from an Intron-Containing Transcript | 17                  | 69                    | 7.93E-05                    |
| HSA-6781823 | Formation of TC-NER Pre-Incision Complex                              | 15                  | 53                    | 7.93E-05                    |
| HSA-73894   | DNA Repair                                                            | 38                  | 290                   | 0.00011                     |
| HSA-167172  | Transcription of the HIV genome                                       | 17                  | 73                    | 0.00013                     |
| HSA-68886   | M Phase                                                               | 42                  | 343                   | 0.00015                     |
| HSA-212436  | Generic Transcription Pathway                                         | 98                  | 1112                  | 0.00017                     |
| HSA-68882   | Mitotic Anaphase                                                      | 28                  | 186                   | 0.00021                     |
| HSA-72165   | mRNA Splicing - Minor Pathway                                         | 14                  | 52                    | 0.00021                     |
| HSA-199991  | Membrane Trafficking                                                  | 62                  | 612                   | 0.00022                     |
| HSA-2467813 | Separation of Sister Chromatids                                       | 27                  | 178                   | 0.00024                     |
| HSA-597592  | Post-translational protein modification                               | 114                 | 1366                  | 0.00024                     |
| HSA-167152  | Formation of HIV elongation complex in the absence of HIV Tat         | 13                  | 48                    | 0.00035                     |
| HSA-5663205 | Infectious disease                                                    | 42                  | 363                   | 0.00039                     |
| HSA-1632852 | Macroautophagy                                                        | 15                  | 66                    | 0.00043                     |
| HSA-5653656 | Vesicle-mediated transport                                            | 63                  | 649                   | 0.00053                     |
| HSA-69618   | Mitotic Spindle Checkpoint                                            | 19                  | 105                   | 0.00054                     |
| HSA-380972  | Energy dependent regulation of mTOR by LKB1-AMPK                      | 10                  | 29                    | 0.00058                     |
| HSA-6781827 | Transcription-Coupled Nucleotide Excision Repair (TC-NER)             | 16                  | 78                    | 0.00062                     |
| HSA-69278   | Cell Cycle Mitotic                                                    | 50                  | 483                   | 0.00080                     |
| HSA-983168  | Antigen processing: Ubiquitination & Proteasome degradation           | 36                  | 303                   | 0.00082                     |
| HSA-8953897 | Cellular responses to external stimuli                                | 48                  | 459                   | 0.00087                     |
| HSA-165159  | mTOR signalling                                                       | 11                  | 39                    | 0.00094                     |
| HSA-5633007 | Regulation of TP53 Activity                                           | 23                  | 159                   | 0.0015                      |
| HSA-5696395 | Formation of Incision Complex in GG-NER                               | 11                  | 42                    | 0.0016                      |
| HSA-3108232 | SUMO E3 ligases SUMOylate target proteins                             | 22                  | 154                   | 0.0025                      |
| HSA-167200  | Formation of HIV-1 elongation complex containing HIV-1 Tat            | 11                  | 46                    | 0.0031                      |
| HSA-5696399 | Global Genome Nucleotide Excision Repair (GG-NER)                     | 15                  | 83                    | 0.0031                      |
| HSA-6782210 | Gap-filling DNA repair synthesis and ligation in TC-NER               | 13                  | 64                    | 0.0031                      |
| HSA-6782135 | Dual incision in TC-NER                                               | 13                  | 65                    | 0.0034                      |
| HSA-983169  | Class I MHC mediated antigen processing & presentation                | 38                  | 365                   | 0.0048                      |
| HSA-141430  | Inactivation of APC/C via direct inhibition of the APC/C complex      | 7                   | 19                    | 0.0052                      |
| HSA-68877   | Mitotic Prometaphase                                                  | 24                  | 190                   | 0.0054                      |
| HSA-6807070 | PTEN Regulation                                                       | 19                  | 135                   | 0.0068                      |
| HSA-6804756 | Regulation of TP53 Activity through Phosphorylation                   | 15                  | 92                    | 0.0070                      |
| HSA-6807505 | RNA polymerase II transcribes snRNA genes                             | 13                  | 74                    | 0.0089                      |
| HSA-72086   | mRNA Capping                                                          | 8                   | 29                    | 0.0089                      |
| HSA-429914  | Deadenylation-dependent mRNA decay                                    | 11                  | 55                    | 0.0090                      |
| HSA-72766   | Translation                                                           | 31                  | 288                   | 0.0090                      |
| HSA-166208  | mTORC1-mediated signalling                                            | 7                   | 22                    | 0.0092                      |
| HSA-6796648 | TP53 Regulates Transcription of DNA Repair Genes                      | 12                  | 65                    | 0.0092                      |
| HSA-3214847 | HATs acetylate histones                                               | 16                  | 107                   | 0.0095                      |
| HSA-167161  | HIV Transcription Initiation                                          | 10                  | 47                    | 0.0097                      |
| HSA-167162  | RNA Polymerase II HIV Promoter Escape                                 | 10                  | 47                    | 0.0097                      |
| HSA-176408  | Regulation of APC/C activators between G1/S and early anaphase        | 13                  | 76                    | 0.0097                      |
| HSA-69052   | Switching of origins to a post-replicative state                      | 14                  | 86                    | 0.0097                      |
| HSA-73776   | RNA Polymerase II Promoter Escape                                     | 10                  | 47                    | 0.0097                      |
| HSA-73779   | RNA Polymerase II Transcription Pre-Initiation And Promoter Opening   | 10                  | 47                    | 0.0097                      |
| HSA-75953   | RNA Polymerase II Transcription Initiation                            | 10                  | 47                    | 0.0097                      |

Table S6

| Gene           | Accession Number | Sense Primer Sequence     | AntiSense Primer Sequence | Product Size                                    |
|----------------|------------------|---------------------------|---------------------------|-------------------------------------------------|
| <i>ACTB</i>    | NM_0011101       | ACTCTTCCAGCCTTCTTCCT      | CAGTGATCTCCTTCTGCATCCT    | 176                                             |
| <i>GAPDH</i>   | NM_002046        | AATCCCATCACCATCTTCCA      | AAATGAGCCCCAGCCTTC        | 122                                             |
| <i>HPRT</i>    | NM_000194.2      | CTGAGGATTTGGAAAGGGTGT     | TAATCCAGCAGGTCAGCAAAG     | 157                                             |
| <i>SF3B1</i>   | NM_012433.3      | CAGTTCCGTCTGTGTGTTCCG     | GCTGCCTTCTTGCCTTGA        | 101                                             |
| <i>VEGFA</i>   | NM_001171623.1   | GGGCAGAATCATCACGAAGT      | ATCTGCATGGTGATGTTGGA      | 218                                             |
| <i>MKI67</i>   | NM_002417.5      | GACATCCGTATCCAGTTCCT      | GCCGTACAGGCTCATCAATAAC    | 139                                             |
| <i>EGFR</i>    | NM_005228.5      | CCTTGCCGCAAAGTGTGTA       | TGTGAAGGAGTCACCCCTAAAT    | 153                                             |
| <i>CDK4</i>    | NM_000075.4      | ACAGTTCGTGAGGTGGCTTT      | TACCTTGATCTCCCGGTCAG      | 111                                             |
| <i>PDGFRA</i>  | NM_006206.6      | CAGGCCCCATTACATCATC       | CATAGCTCCGTGTGCTTTCA      | 162                                             |
| <i>PDGFRB</i>  | NM_002609.4      | AGCTTGCTCCTCAATGTCTCCA    | GGGATCTGGCACAAAGATGTA     | 248                                             |
| <i>SRSF3</i>   | NM_003017.4      | TAACCCTAGATCTCGAAATGCATC  | CATAGTAGCCAAAAGCCCGTT     | 117                                             |
| <i>RBM22</i>   | NM_018047.2      | CTCTGGGTTCCAACACCTACA     | GGCACAGATTTTGCATTCT       | 137                                             |
| <i>PTBP1</i>   | NM_002819.4      | TGGGTCCGTTCTGCTATT        | CAGATCCCCGCTTTGTAC        | 111                                             |
| <i>RBM3</i>    | NM_006743.4      | AAGCTCTTCGTGGGAGGG        | TTGACAACGACCACCTCAGA      | 98                                              |
| <i>MYC</i>     | NM_002467.6      | CTCGGATTCTCTGCTCTCCTC     | TTCTCATCTTCTTGTTCCTCT     | 124                                             |
| <i>CCND1</i>   | NM_053056.3      | CCTCGGTGCTCTACTTCAAAT     | TCCTCCTCGCACTTCTGTTC      | 109                                             |
| <i>SRSF1</i>   | NM_006924.5      | TGTCTCTGGACTGCCTCCA       | TGCCATCTCGGTAACATCA       | 98                                              |
| <i>BCL2L1</i>  | NM_138578.3      | TCCCCATGGCAGCAGTAAAG      | GGTGGGAGGGTAGAGTGGAT      | 494 <i>BCL2L1-xS</i><br>305 <i>BCL2L1-xL</i>    |
| <i>BCL2-xS</i> | NM_001191.4      | GAGCTTTGAACAGGATACTTTTGTG | GAAGAGTGAGCCCAGCAGAA      | 97                                              |
| <i>BCL2-xL</i> | NM_001317919.2   | GATGGCCACTTACCTGAATGA     | TGCTGCATTGTTCCCATAGA      | 94                                              |
|                | NM_001317920.2   |                           |                           |                                                 |
|                | NM_001317921.2   |                           |                           |                                                 |
|                | NM_001322239.2   |                           |                           |                                                 |
|                | NM_001322240.2   |                           |                           |                                                 |
| <i>KLF6</i>    | NM_001322242.2   | CATCTTCTCCGGAAGTGGAGC     | GCTATGCCGCTTCTTACAGG      | 585 KLF6a<br>459 KLF6b<br>461 KLF6c             |
|                | NM_138578.3      |                           |                           |                                                 |
| <i>CRK</i>     | NM_001300.6      | GCAAGAGAGGGGATGATTCCA     | ATGGGAAGTGACCTCGTTTG      | 333 CRKsvI<br>163 CRKsvII                       |
|                | NM_001160124.2   |                           |                           |                                                 |
| <i>MCL1</i>    | NM_001160125.2   | AGACCTTACGACGGGTTGG       | ACCAGCTCCTACTCCAGCAA      | 401 MCL1L<br>153 MCL1S                          |
|                | NM_005206.5      |                           |                           |                                                 |
| <i>CASP2</i>   | NM_016823.4      | AACTGCCCAAGCCTACAGAA      | CTGCGTGGTTCTTTCCATCT      | 167 CASP2S<br>106 CASP2L                        |
|                | NM_182763.3      |                           |                           |                                                 |
| <i>RAC1</i>    | NM_021960.5      | CCCTATCCTATCCGCAAACA      | GGAAGTCAAGGAAAAGCA        | 55 RAC1<br>112 RAC1b                            |
|                | NM_001224.5      |                           |                           |                                                 |
| <i>BIRC5</i>   | NM_032982.4      | CCTATGAGAACGAGCCAGA       | GAGAGAAGCAGCCACTGTTACC    | 516 BIRC5<br>585 BIRC5-2b<br>398 BIRC5-ΔEx3     |
|                | NM_018890.4      |                           |                           |                                                 |
| <i>MST1R</i>   | NM_006908.5      | GATGGAGCTGCTGGCTTTAC      | ATCTACGCAGACCTGCAATG      | 270 RON<br>150 RONlack11                        |
|                | NM_001012270.2   |                           |                           |                                                 |
| <i>SPP1</i>    | NM_001012271.2   | GCATCACCTGTGCCATACC       | TGGACTTACTTGGAAGGGTCTC    | 390 SPP1<br>201 SPP1a<br>159 SPP1b<br>120 SPP1c |
|                | NM_001168.3      |                           |                           |                                                 |
|                | NM_002447.4      |                           |                           |                                                 |
|                | XM_011533739.2   |                           |                           |                                                 |

Table S7

| <b>Name</b>        | <b>3'-5' ASO sequence</b>       | <b>5'-3' <i>BCL2L1</i> Targeted Region</b> | <b>Oligo Size</b> |
|--------------------|---------------------------------|--------------------------------------------|-------------------|
| <i>ASO1_BCL2L1</i> | <b>TGTTCAAAGCTCTGATATGCTGTC</b> | GACAGCATATCAGAGCTTTGAACA                   | 24 bases          |
| <i>ASO2_BCL2L1</i> | <b>CCCCATCCCGGAAGAGTTC</b>      | GAACTCTTCCGGGATGGGG                        | 19 bases          |
| <i>ASO3_BCL2L1</i> | <b>ACAATGCGACCCCAGTTTA</b>      | TAAACTGGGGTCGCATTGT                        | 19 bases          |
| <i>ASO4_BCL2L1</i> | <b>CGCCGAAGGAGAAAAAGGCC</b>     | GGCCTTTTTCTCCTTCGGCG                       | 20 bases          |
| <i>ASO5_BCL2L1</i> | <b>TTCCACGCACAGTGCCC</b>        | GGGCACTGTGCGTGAAAA                         | 18 bases          |

Table S8

| Drug Name                | Drug Target                                          | Target Pathway Annotation         |
|--------------------------|------------------------------------------------------|-----------------------------------|
| Wnt-C59                  | PORCN                                                | WNT signaling                     |
| IWP-2                    | PORCN                                                | WNT signaling                     |
| Staurosporine            | Broad spectrum kinase inhibitor                      | RTK signaling                     |
| GSK1904529A              | IGF1R, IR                                            | RTK signaling                     |
| Crizotinib               | MET, ALK, ROS1                                       | RTK signaling                     |
| Foretinib                | MET, KDR, TIE2, VEGFR3/FLT4, RON, PDGFR, FGFR1, EGFR | RTK signaling                     |
| Cediranib                | VEGFR, FLT1, FLT2, FLT3, FLT4, KIT, PDGFRB           | RTK signaling                     |
| ML323                    | USP1, UAF1                                           | Protein stability and degradation |
| MK-2206                  | AKT1, AKT2                                           | PI3K/MTOR signaling               |
| Rapamycin                | MTORC1                                               | PI3K/MTOR signaling               |
| Pilralisib               | PI3K                                                 | PI3K/MTOR signaling               |
| Dactolisib               | PI3K (class 1), MTORC1, MTORC2                       | PI3K/MTOR signaling               |
| Alpelisib                | PI3Kalpha                                            | PI3K/MTOR signaling               |
| CZC24832                 | PI3Kgamma                                            | PI3K/MTOR signaling               |
| PRIMA-1MET               | TP53 activation                                      | p53 pathway                       |
| Vinorelbine              | Microtubule destabiliser                             | Mitosis                           |
| Docetaxel                | Microtubule stabiliser                               | Mitosis                           |
| Paclitaxel               | Microtubule stabiliser                               | Mitosis                           |
| TTK_3146                 | TTK                                                  | Mitosis                           |
| AICA Ribonucleotide      | AMPK agonist                                         | Metabolism                        |
| GSK2606414               | PERK                                                 | Metabolism                        |
| TAK-715                  | p38alpha, p38beta                                    | JNK and p38 signaling             |
| Linsitinib               | IGF1R                                                | IGF1R signaling                   |
| NVP-ADW742               | IGF1R                                                | IGF1R signaling                   |
| Fulvestrant              | ESR                                                  | Hormone-related                   |
| VE-822                   | ATR                                                  | Genome integrity                  |
| Mirin                    | MRE11                                                | Genome integrity                  |
| BIBR-1532                | TERT                                                 | Genome integrity                  |
| VX-11e                   | ERK2                                                 | ERK MAPK signaling                |
| KRAS (G12C) Inhibitor-12 | KRAS (G12C)                                          | ERK MAPK signaling                |
| Lapatinib                | EGFR, ERBB2                                          | EGFR signaling                    |
| Cyclophosphamide         | Alkylating agent                                     | DNA replication                   |
| Doxorubicin              | Anthracycline                                        | DNA replication                   |
| Mitomycin-C              | DNA crosslinker                                      | DNA replication                   |
| Pyridostatin             | G-quadruplex stabiliser                              | DNA replication                   |
| Etoposide                | TOP2                                                 | DNA replication                   |
| Carmustine               |                                                      | DNA replication                   |
| BDP-00009066             | MRCKB_HUMAN                                          | Cytoskeleton                      |
| PAK_5339                 | PAK1, PAK2                                           | Cytoskeleton                      |
| I-BET-762                | BRD2, BRD3, BRD4                                     | Chromatin other                   |
| JQ1                      | BRD2, BRD3, BRD4, BRD4                               | Chromatin other                   |
| PFI-1                    | BRD4                                                 | Chromatin other                   |
| PFI3                     | Polybromo 1, SMARCA4, SMARCA2                        | Chromatin other                   |
| EPZ5676                  | DOT1L                                                | Chromatin histone methylation     |
| GSK343                   | EZH2                                                 | Chromatin histone methylation     |
| GSK591                   | PMRT5                                                | Chromatin histone methylation     |
| OF-1                     | BRPF1B, BRPF2                                        | Chromatin histone acetylation     |
| Vorinostat               | HDAC inhibitor Class I, IIa, IIb, IV                 | Chromatin histone acetylation     |
| Dacinostat               | HDAC1                                                | Chromatin histone acetylation     |
| JQ12                     | HDAC1, HDAC2                                         | Chromatin histone acetylation     |
| Entinostat               | HDAC1, HDAC3                                         | Chromatin histone acetylation     |
| ACY-1215                 | HDAC6                                                | Chromatin histone acetylation     |
| PCI-34051                | HDAC8, HDAC6, HDAC1                                  | Chromatin histone acetylation     |
| Flavopiridol             | CDK                                                  | Cell cycle                        |
| RO-3306                  | CDK1                                                 | Cell cycle                        |
| AZD5438                  | CDK2                                                 | Cell cycle                        |
| Palbociclib              | CDK4, CDK6                                           | Cell cycle                        |
| THZ-2-102-1              | CDK7                                                 | Cell cycle                        |
| Wee1 Inhibitor           | WEE1, CHEK1                                          | Cell cycle                        |
| Embelin                  | XIAP                                                 | Apoptosis regulation              |
| AZD5582                  | XIAP, cIAP                                           | Apoptosis regulation              |

Table S9

| <b>Drug Name</b> | <b>Drug Target</b>              | <b>Target Pathway Annotation</b> |
|------------------|---------------------------------|----------------------------------|
| Staurosporine    | Broad spectrum kinase inhibitor | RTK signaling                    |
| Motesanib        | VEGFR, RET, KIT, PDGFR          | RTK signaling                    |
| SB505124         | TGFBR1, ACVR1B, ACVR1C          | RTK signaling                    |
| PD173074         | FGFR1, FGFR2, FGFR3             | RTK signaling                    |
| Tivozanib        | VEGFR1, VEGFR2, VEGFR3          | RTK signaling                    |
| Pazopanib        | CSF1R, KIT, PDGFRA, PDGFRB      | RTK signaling                    |
| PD173074         | FGFR1, FGFR2, FGFR3             | RTK signaling                    |
